# Supplementary material for: Alveolar echinococcosis in solid organ transplant recipients: a case series from two national cohorts
Source: PubMed Central journal article supplement (PMC10069401; doi:10.1051/parasite/2023008), 2023-03-31
Supplement: parasite-30-9-s1.pdf [file parasite-30-9-s1.pdf]

**Supplementary Table 1: Summary of the published performance of the different serologic assays used in this study**

| Serology                              | Sensitivity               | Specificity                                                                         | Commentary                                                                                                                                           | Reference |
|---------------------------------------|---------------------------|-------------------------------------------------------------------------------------|------------------------------------------------------------------------------------------------------------------------------------------------------|-----------|
| Em2 ELISA                             | 89%                       | 98%                                                                                 | Uses Em2 antigen (from <i>E. multilocularis</i> laminated layer), an antigen which may persist in non-viable AE lesions                              | [15]      |
| Em2+ ELISA                            | 97%                       | 90%                                                                                 | Uses a combination of the Em2 antigen and a recombinant II/3-10 protein (antigen considered to be a marker of metacestode viability)                 | [15]      |
| EgHF                                  | 97%                       | 61%                                                                                 | Uses heterologous antigen ( <i>E. granulosus s.l.</i> fluid).                                                                                        | [15]      |
| Indirect Hemagglutination Assay (IHA) | 74% (1:320)<br>94% (1:80) | ND                                                                                  | Uses heterologous antigen ( <i>E. granulosus s.l.</i> fluid). Sensitivity is highly improved by using a 1/80 dilution threshold [1].                 | [1,23]    |
| Western blot                          | 97%                       | Varies between 88 – 100%.<br>Depends on the MW of the observed bands <sup>a</sup> . | Uses whole <i>E. multilocularis</i> metacestode antigenic extract. Depending on the detected bands, allows the differentiation at the species level. | [23]      |

<sup>a</sup> MW: molecular weight; bands at 7 and 26-28 kDa are specific for *Echinococcus*, bands at 16 and 18 kDa are specific for *Echinococcus multilocularis*
